# 1 Denitrifying bradyrhizobia retain strong N<sub>2</sub>O reduction during periods of starvation

2 Yuan Gao, Magnus Øverlie Arntzen, Morten Kjos, Lars R. Bakken and Åsa Frostegård

3 Faculty of Chemistry, Biotechnology and Food Sciences, Norwegian University of Life Sciences,

4 N-1432 Ås, Norway

5

## 6 **Abstract**

7 Rhizobia living as microsymbionts inside nodules have stable access to carbon substrates, but  
8 also have to survive as free-living bacteria in soil where they are starved for carbon and energy  
9 most of the time. Many rhizobia can denitrify, thus switch to anaerobic respiration under low  
10 O<sub>2</sub> tension using N-oxides as electron acceptors. The cellular machinery regulating this  
11 transition is relatively well-known from studies under optimal laboratory conditions, while little  
12 is known about this regulation in starved organisms. It is, for example, not known if the strong  
13 preference for N<sub>2</sub>O- over NO<sub>3</sub><sup>-</sup>-reduction in bradyrhizobia is retained under carbon limitation.  
14 Here we show that starved cultures of a *Bradyrhizobium* strain with respiration rates 1-18% of  
15 well-fed cultures, reduced all available N<sub>2</sub>O before touching provided NO<sub>3</sub><sup>-</sup>. Proteomics showed  
16 similar abundance of Nap (periplasmic NO<sub>3</sub><sup>-</sup> reductase) and NosZ (N<sub>2</sub>O reductase), suggesting  
17 that competition between electron pathways to Nap and NosZ favoured N<sub>2</sub>O reduction also in  
18 starved cells, similar to well-fed cultures. This contrasts the general notion that NosZ activity  
19 diminishes under carbon limitation. The results suggest that bradyrhizobia carrying NosZ can  
20 act as strong sinks for N<sub>2</sub>O under natural conditions and that this criterion should be considered  
21 in the development of biofertilizers.

22

## 23 **Importance**

24 Novel biotechnological approaches are needed to curb the escalating emissions of the  
25 greenhouse gas N<sub>2</sub>O from agricultural soils. One possibility is inoculation of N<sub>2</sub>O-reducing  
26 organisms into soil. Rhizobial inoculants are used at large scale to enhance N<sub>2</sub>-fixation of  
27 legumes. The genus *Bradyrhizobium* encompasses N<sub>2</sub>-fixing symbionts of economically  
28 important legumes. Most bradyrhizobia can also denitrify, but the commercially available  
29 inoculants generally lack the last denitrification step, reduction of N<sub>2</sub>O. Recent results revealed  
30 that bradyrhizobia with complete denitrification strongly favor N<sub>2</sub>O over nitrate, making them  
31 potential strong sinks for N<sub>2</sub>O. In those studies the cultures received ample amounts of  
32 substrate, while bacteria in soil generally starve. Here we demonstrate that bradyrhizobia  
33 retain their strong preference for N<sub>2</sub>O also under carbon starvation. The findings add basic  
34 knowledge about mechanisms controlling denitrification and support the potential for  
35 developing new bradyrhizobial legume inoculants with the dual capacity to optimize N<sub>2</sub>-fixation  
36 and minimize N<sub>2</sub>O emission.

37

## 38 **Introduction**

39 Bacteria in most natural and engineered environments are faced with fluctuating availability of  
40 nutrients and need to adapt to a “feast and famine” lifestyle. While many soil types are rich in  
41 total organic carbon, the concentration of bioavailable carbon substrate is low, particularly in  
42 non-rhizosphere soil where lack of substrate is a major factor limiting the growth of  
43 heterotrophic bacteria (1). It is likely that bacteria in soil are starved most of the time (2) and  
44 only experience infrequent episodes of ample provision of carbon substrate, for example as

45 exudates from a root or organic material released during decay of dead (micro)organisms.  
46 Bacteria have developed several strategies to survive extended periods of starvation, such as  
47 the development of high-affinity uptake systems to scavenge alternative carbon sources from  
48 the surroundings, as well as changes in cell morphology, condensation of the nucleoid and  
49 decreased protein synthesis to adapt to a low metabolic activity (3). Many bacteria produce  
50 carbon-rich storage materials such as PHA (poly-3-hydroxyalkanoates) and glycogen during  
51 periods of substrate availability, which can be utilized to sustain a minimum of metabolic  
52 activity when deprived of carbon and energy (4,5).

53 Several of the microbially mediated processes in the global nitrogen cycle are closely linked  
54 to the carbon (C) metabolism of the organisms. One example is denitrification, which is the  
55 reduction of  $\text{NO}_3^-$  to  $\text{N}_2$  through anaerobic respiration where the N-oxides are used as terminal  
56 electron acceptors when  $\text{O}_2$  becomes scarce. This process can be performed by a diverse range  
57 of heterotrophic bacteria, archaea and fungi, which use various forms of organic compounds as  
58 electron donors to obtain energy (6) or, in some cases,  $\text{H}_2$  (7). The last step of denitrification is  
59 the reduction of  $\text{N}_2\text{O}$ , a strong climate gas, to harmless  $\text{N}_2$ , catalyzed by the  $\text{N}_2\text{O}$  reductase  
60 (Nos) (8,9). It is found in a diverse range of prokaryotic organisms but has not been reported in  
61 eukaryotes. Some denitrifying prokaryotes can perform all steps of denitrification, others only  
62 some, and lack of the last step is common due to absence of the *nosZ* gene coding for NosZ, or  
63 lack of other essential gene(s) in the *nos* operon (10,11), but the amounts of  $\text{N}_2\text{O}$  released from  
64 denitrification in relation to  $\text{N}_2$  (the  $\text{N}_2\text{O}/\text{N}_2$  product ratio) is also influenced by transcriptional  
65 and post-transcriptional control mechanisms and by various environmental factors (6,12-19).  
66 Denitrification in agricultural soils is a major source of  $\text{N}_2\text{O}$ , accounting for more than 60% of

67 the global anthropogenic emissions (20,21). A steady increase in atmospheric N<sub>2</sub>O has been  
68 recorded since the start of industrialization, largely driven by increasing and excessive use of  
69 synthetic fertilizers (22,23) and these emissions are predicted to continue to increase unless  
70 novel mitigation options are developed (24,25).

71 Although the addition of reactive nitrogen compounds via synthetic fertilizers accounts for  
72 the main part of the N<sub>2</sub>O emissions from agricultural soil, the N<sub>2</sub>O emitted from legume  
73 cropped fields is far from negligible. A compilation of data from ca 70 legume cropped fields  
74 estimated ca 1.29 kg N<sub>2</sub>O-N ha<sup>-1</sup> during one growing season, while the corresponding data for  
75 N-fertilized crops and pastures showed emissions of 3.22 kg N<sub>2</sub>O-N ha<sup>-1</sup> (26). Legumes do not  
76 have to rely on uptake of reactive N such as NH<sub>4</sub><sup>+</sup> or NO<sub>3</sub><sup>-</sup> but can acquire N through their  
77 symbiotic relationship with some groups of bacteria, collectively called rhizobia, that elicit the  
78 production of root nodules on the plant in which they fix atmospheric N<sub>2</sub>. In this process, the  
79 rhizobia reduce N<sub>2</sub> to NH<sub>3</sub> and the plant cells reduce the NH<sub>3</sub> further to glutamine which they  
80 use to produce amino acids and eventually proteins (27). When this N-rich plant material is  
81 degraded, organic N is released and mineralized to NH<sub>3</sub>/NH<sub>4</sub><sup>+</sup> which will be oxidized to NO<sub>3</sub><sup>-</sup> by  
82 nitrifying organisms. The O<sub>2</sub> consumption by the nitrifiers, together with the production of NO<sub>3</sub><sup>-</sup>  
83 and the availability of organic compounds from the degraded plants, creates conditions that are  
84 conducive to denitrification. A novel approach to minimize N<sub>2</sub>O emissions from agricultural soil  
85 is to enhance the populations of N<sub>2</sub>O reducing bacteria (25). In the case of legume crops, which  
86 are often inoculated with rhizobia to optimize the N<sub>2</sub>-fixation, there are a few promising studies  
87 reporting decreased N<sub>2</sub>O emissions from soybean fields inoculated with rhizobia with the dual  
88 capability of efficient N<sub>2</sub> fixation and N<sub>2</sub>O reduction (28,29).

89       Based on this, selection of rhizobial strains for development of commercial inoculants  
90 should, ideally, take both these aspects into account. One problem is, however, that far from all  
91 rhizobia carry the *nosZ* gene that encodes Nos. There are relatively few surveys of  
92 denitrification genes in different groups of rhizobia. Complete denitrification, which includes all  
93 four reduction steps of  $\text{NO}_3^-$  to  $\text{N}_2$ , has so far mainly been reported for the genus  
94 *Bradyrhizobium*, which is the microsymbiont of a range of economically important legume  
95 crops such as soybean, cow pea and peanut (30,31). A full set of denitrification reductases in  
96 bradyrhizobia include, with few exceptions, the periplasmic  $\text{NO}_3^-$  reductase Nap; the Cu-  
97 containing  $\text{NO}_2^-$  reductase NirK, the *bc*-type NO reductase cNor and a NosZ belonging to clade I  
98 (19,32). We recently investigated the denitrification capacity of bradyrhizobia from two strain  
99 collections, one obtained from nodules of legume trees and herbs growing in Ethiopia, the  
100 other mainly consisting of strains isolated from nodules of peanut growing in China (18,19). In  
101 these collections, 50 and 37% of the isolates, respectively, were complete denitrifiers, while the  
102 others generally lacked NosZ and thus were potential  $\text{N}_2\text{O}$  sources. Common to all strains with  
103 complete denitrification was a strong preference for  $\text{N}_2\text{O}$ - over  $\text{NO}_3^-$  reduction. Transcription  
104 analysis and proteomics showed comparable expression levels of Nap and Nos, suggesting a  
105 control mechanism at the metabolic level where the electron pathway to Nos, which receives  
106 electrons from cytochrome *c* via the *bc1* complex, competes very efficiently with the electron  
107 pathway to Nap which goes via the membrane bond NapC.

108       The results presented in (18,19) were based on experiments with organisms provided with  
109 ample amounts of C substrate (electron donor), which is likely to reflect the situation in legume  
110 nodules where the microsymbiont receives C from the plant. It can, however, be expected that

111 rhizobia, which may survive for many years in soil (33), spend a large part of their life cycle as  
112 free-living organisms in soil where they will experience lack of available C substrate most of the  
113 time (2). Rhizobial inoculants that carry NosZ are thus potentially important sinks for N<sub>2</sub>O  
114 produced both by themselves and by other soil microbes. It is, however, not known if the  
115 competition for electrons favoring N<sub>2</sub>O reduction in well-fed cultures is retained during  
116 substrate limitation (“starvation”). Here we exposed cultures of *Bradyrhizobium* strain HAMBI  
117 2125, also studied in (19), to shorter and extended periods of starvation and analyzed the  
118 denitrification kinetics, including the electron flow rates to the individual denitrification  
119 reductases. We also quantified the cellular abundancies of Nap, Nir and Nos. The results have  
120 practical implications, supporting that these organisms can act as sinks for N<sub>2</sub>O under natural  
121 conditions. Moreover, the results are ecologically interesting since they show that cultures  
122 exposed to extended starvation divided into two opposite denitrification phenotypes, one with  
123 very slow metabolism, the other with retained metabolism, possibly reflecting a strategy to  
124 increase the chances for survival during periods of starvation.

125

## 126 **Results**

127 **Denitrification kinetics in cultures prepared following Bioassay 1.** Two bioassays were  
128 developed for starvation experiments, Bioassay 1 and 2 (Figs. 1A and B). In a first experiment,  
129 the denitrification gas kinetics, concentrations of NO<sub>3</sub><sup>-</sup> and NO<sub>2</sub><sup>-</sup> and electron flow rates to the  
130 different reductases were compared for well-fed vs starved cultures (Figs. 2A-D). For this, the  
131 starved cultures were prepared following Bioassay 1 (Fig. 1A), in which the cultures were  
132 allowed to synthesize the denitrification reductases in the presence of ample amounts of

133 substrate. Cultures were raised under fully oxic conditions in YMB medium, after which the  
134 headspace was made hypoxic to allow transition to anaerobic respiration in response to a  
135 gradual depletion of oxygen. After centrifugation/washing, pellets were pooled and inoculated  
136 into flasks containing YMB ( $9.9\text{E}+08$  cells flask<sup>-1</sup>) or buffer ( $5.0\text{E}+09$  cells flask<sup>-1</sup>), supplemented  
137 with 1 mM KNO<sub>3</sub> and 0.25 mM KNO<sub>2</sub>, and with He plus 1 ml N<sub>2</sub>O (around 80 μmol N) in  
138 headspace.

139 The initial O<sub>2</sub> concentration, which was 0.5 μM in cultures with YMB and 0.2 μM in cultures  
140 with buffer, was depleted within the first 5 h in both treatments (insets in Figs. 2A and B). The  
141 provided NO<sub>2</sub><sup>-</sup> and N<sub>2</sub>O were reduced simultaneously from the beginning of the incubation in  
142 both treatments. The NO<sub>3</sub><sup>-</sup> was left untouched in the well-fed cultures until the exogenous N<sub>2</sub>O  
143 was reduced (Fig. 2A), also seen from lack of electron flow to Nap except for a small peak in  
144 electron flow early in the anoxic incubation (Fig. 2C). No NO<sub>3</sub><sup>-</sup> reduction took place in the  
145 starved cultures throughout the entire incubation period, as seen from the lack of electron flow  
146 to Nap (Fig. 2D). The negative  $V_{eNap}$  estimated for the starved cultures (inset in Fig. 2D) and the  
147 initial phase of the well-fed cultures are probably due to minor errors in calibration of N-gas  
148 measurements as well as in parameters used to calculate rates of N-transformation (sampling  
149 loss and N<sub>2</sub>-leakage, see Molstad et al. (34)), which amounts to substantial errors in the  
150 estimates of NO<sub>3</sub><sup>-</sup> reduction rates because they are based on N-mass balance (explained in detail  
151 by Lim et al. (35)). This implies a relatively high detection limit for NO<sub>3</sub><sup>-</sup> reduction, and the  
152 negative values cannot be taken as evidence for the complete absence of any electron flow to  
153 NO<sub>3</sub><sup>-</sup>. However, the measured NO concentrations lend some support to the claim that  $V_{eNap}$  was  
154 ~0 until depletion of the externally provided N<sub>2</sub>O. In the well-fed culture, the concentration of

155 NO declined to zero in response to depletion of  $\text{NO}_2^-$ , and increased soon after, as  $V_{eNap}$   
156 increased (Figs. 2A and C). Likewise, the NO concentration declined to very low values in  
157 response to depletion of  $\text{NO}_2^-$  in the starved culture (Fig. 2B).

158 Fig. 2C and D show the calculated electron flow rates per cell to the individual reductases,  
159 and their sum, illustrating their competition for electrons. This shows that the well-fed cells  
160 (Fig. 2C) sustained a nearly constant total electron flow rate around  $9 \text{ fmol e}^- \text{ cell}^{-1} \text{ h}^{-1}$   
161 throughout, but allocated to different reductases depending on the availability of electron  
162 acceptors: As long as  $\text{NO}_2^-$  and  $\text{N}_2\text{O}$  were both present, Nos captured around 50% of the  
163 electrons ( $V_{eNos} \sim V_{eNir} + V_{eNor}$ ), increasing to 100% when  $\text{NO}_2^-$  was depleted after 6-7 hours,  
164 while the electron flow rate to Nap remained insignificant until the externally provided  $\text{N}_2\text{O}$   
165 became depleted. The starving cells (Fig. 2D) had an order of magnitude lower total electron  
166 flow rate per cell, declining gradually throughout the incubation, and here Nos captured  $\gg 50\%$   
167 of the electrons during the first 10 h ( $V_{eNos} \gg V_{eNir} + V_{eNor}$ ), but declined to  $\sim 50\%$  towards the  
168 end.

169 Bioassay 1 was also used in a second experiment, but in this case the cultures were  
170 incubated anoxically ( $[\text{O}_2] < 0.21 \pm 0.04 \mu\text{M}$ ) in buffer containing only one of the N-oxides ( $\text{NO}_3^-$ ,  
171  $\text{NO}_2^-$  or  $\text{N}_2\text{O}$ ) as initial electron acceptor (Figs. 3A-C). This experiment established that starved  
172 cultures readily reduced  $\text{NO}_3^-$  from the start when no other N-oxide was provided (Fig. 3A). It  
173 also demonstrated that the cell specific electron flow to N-oxides was practically unaffected by  
174 the type of electron acceptor provided, except for the slightly lower rates initially for flasks with  
175  $\text{NO}_2^-$ . For all treatments, the cell specific electron flow rate decreased gradually throughout,  
176 and the levels are very similar to those observed in the first experiment (Fig. 3D).



177

178       **Cell size and PHA accumulation of starved vs well-fed cultures.** The morphologies of single  
179 bacterial cells from different treatments (starved/well-fed and anoxic/oxic) were analyzed by  
180 phase contrast microscopy (Fig. S1A). By quantifying cell dimensions, we found marginal but  
181 statistically significant effects (Mann-Whitney test,  $p < 0.01$ ) of starvation: while there was no  
182 significant difference in cell area of individual cells (Fig. S1B), starved cells were on average  
183 ~12% longer and ~5% thinner than well-fed cells (Fig. S1B). By further calculating cell volumes, a  
184 slight reduction in average cell volume was observed upon starvation of aerobic cells ( $p=0.057$ ),  
185 but not for cells grown under anoxic conditions (Fig. S1C). Furthermore, a qualitative analysis of  
186 the presence of PHA granules was done by staining the cells with Nile Red, a lipophilic dye with  
187 high affinity for PHA (36). Large foci corresponding to PHA granules were seen in all conditions.  
188 It should be noted that, as a lipophilic dye, Nile Red will also bind non-specifically to lipids and  
189 membrane, and based on the imaging performed here, it could not be concluded whether there  
190 were any significant differences in PHA content between the conditions.

191

192       **Denitrification kinetics after providing starving cultures with an artificial electron donor.**

193 An experiment was then performed in which TMPD plus ascorbate was added to starved  
194 cultures (Bioassay 1), to provide cytochrome *c* with an excess of electrons (37,38). Since  
195 cultures treated according to Bioassay 1 were able to provide electrons for denitrification (10-  
196 18% of the electron flow in well-fed cells during the first 5 h, then decreasing to ca 4%; Fig. 2D),  
197 we expected that the TMPD treatment would reduce or eliminate the oxidation of quinol by the  
198 *bc1* complex and that this would allow electrons to flow to Nap via NapC, resulting in  $\text{NO}_3^-$

199 reduction. We also expected that loading cytochrome *c* with electrons would relieve or weaken  
200 the competition for electrons between Nir, Nor and NosZ. The results (Fig. 4) lend little support  
201 to the former since the electron flow to Nap remained insignificant until N<sub>2</sub>O had been  
202 depleted. But the results confirm an effect of TMPD on the competition between Nos and Nir:  
203  $V_{eNir}$ ,  $V_{eNor}$  and  $V_{eNos}$  were similar and high (4-5 fmol e<sup>-</sup> cell<sup>-1</sup> h<sup>-1</sup>) until NO<sub>2</sub><sup>-</sup> was depleted. Thus,  
204 Nir and Nos competed equally well when the cytochrome *c* pool was fully reduced by TMPD.  
205 After depletion of NO<sub>2</sub><sup>-</sup>,  $V_{eNos}$  leaped to its maximum level, 13-14 fmol N cell<sup>-1</sup> h<sup>-1</sup>, and kept this  
206 rate until all the exogenous N<sub>2</sub>O was depleted.

207

208 **Denitrification kinetics and reductase abundancies of cultures exposed to extended**  
209 **starvation following Bioassay 2.** While Bioassay 1 successfully induced starvation in terms of a  
210 downshift in respiration, the rates did not reach a stable level during the assay but declined  
211 gradually throughout, apparently approaching more stable low levels after 20 h. On this  
212 background, we introduced a more severe starvation assay (Bioassay 2, Fig. 1B) by including a  
213 20 h aerobic incubation in buffer prior to the starvation-denitrification assay, in order to reach a  
214 lower and more stable rate of respiration than in the first experiment. In addition, Bioassay 2  
215 was designed to force the cells to synthesize the denitrification proteome while starving. In  
216 several preliminary experiments with Bioassay 2 (results not shown), we found a conspicuous  
217 variability between flasks regarding the cell specific respiration rate where one or two out of  
218 three replicate flasks had four to six times higher cell respiration rates than the other(s). At first,  
219 we suspected that it could be due to impurities of flasks or magnets, but meticulous acid  
220 washing failed to remove the stochastic variation. Being convinced that the stochasticity

221 reflects a real regulatory switch of the cultures, we performed a final experiment in which 15  
222 replicate flasks were monitored for denitrification kinetics (Fig. 5).

223 The cultures received initially 1 mM  $\text{NO}_3^-$  in the buffer (but no  $\text{NO}_2^-$ ), and He plus 1 ml  $\text{N}_2\text{O}$   
224 (80  $\mu\text{mol N}$ ) in headspace. The  $\text{O}_2$  concentration at the time of inoculation was  $<0.5 \mu\text{M}$  in the  
225 liquid. The flasks separated into two distinct denitrification phenotypes (Figs. 5A and B). Nine  
226 flasks showed “low” cell specific respiration rates (total electron flow maximum  $0.27 \text{ fmol e}^-$   
227  $\text{cell}^{-1} \text{ h}^{-1}$ ), corresponding to approximately 2.7% compared to well-fed cultures (Fig. 5A), while  
228 the other six showed a “fast” respiration rate (total electron flow  $1.0\text{-}1.8 \text{ fmol e}^- \text{ cell}^{-1} \text{ h}^{-1}$ ). Both  
229 phenotypes reduced  $\text{N}_2\text{O}$  from the beginning of the incubation, showing a strong preference for  
230  $\text{N}_2\text{O}$  over  $\text{NO}_3^-$ . In the flasks with fast respiration, the cells started to reduce  $\text{NO}_3^-$  in response to  
231 depletion of the externally provided  $\text{N}_2\text{O}$ . In the flasks with slow respiration,  $\text{N}_2\text{O}$  was not  
232 depleted within the time frame of the experiment, and  $\text{NO}_3^-$  reduction remained negligible.

233 To investigate if cell lysis, and thus release of available C, could explain why some cultures  
234 showed the “fast” growth phenotype, we compared the  $\text{OD}_{600}$  and the number of viable cells in  
235 “slow” vs “fast” cultures. The samples were taken after incubation for 3.1 h in anoxic buffer,  
236 when the two phenotypes were clearly distinct but when some possible growth of cells in the  
237 “fast” cultures would not yet hide if lysis had occurred. The  $\text{OD}_{600}$  spanned from 0.12-0.13 with  
238 no statistical difference ( $p>0.3$ ) between cultures with “fast” and “slow” respiration. Similarly,  
239 no difference ( $p=0.4$ ) was found for the viable counts which showed  $1.21\text{E}+10$  to  $1.33\text{E}+10$  CFU  
240  $\text{flask}^{-1}$  for the “fast” cultures and  $1.23\text{E}+10$  to  $1.34\text{E}+10$  CFU  $\text{flask}^{-1}$  for the “slow” cultures (Fig.  
241 S2).

242 We also tested the metabolic integrity of the cells in the flasks with slow respiration by  
243 injecting C-substrates (YMB) to the flasks after 24.8 hours, which proved their capacity to  
244 quickly regain activity approaching that of well-fed cells (Fig. 5A). To investigate if the observed  
245 divergencies in phenotypes were due to differences in denitrification reductase abundancies,  
246 we quantified the relative abundances of Nap, NirK and NosZ in samples taken at different time  
247 points throughout the incubations (Figs. 5E and F), together with the corresponding  
248 denitrification kinetics (Figs. 5A and B) and cell specific electron flow to reductases (Figs. 5C and  
249 D). The membrane-bound NO reductase (cNor) could not be extracted quantitatively (the  
250 results showed 1000 times lower abundancies than for the other denitrification reductases) and  
251 is therefore not shown. The inoculum had been cultured aerobically for 3-4 generations, never  
252 permitting the OD<sub>600</sub> to exceed 0.1, to secure that any denitrification enzymes would be diluted  
253 to extinction by aerobic growth, assuming that the transcription of all genes is effectively  
254 repressed by oxygen. This strategy was apparently successful since Nap and Nir were  
255 undetectable at the start of the anoxic incubation. NosZ, on the other hand, was detected also  
256 in the aerobic cultures, suggesting that the *nosZ* gene is constitutively transcribed at low levels  
257 in these organisms.

258 After transferring the cells to anoxic buffer, the abundance of all three reductases increased  
259 both in cultures with “slow” and “fast” respiration. Cultures with “slow” respiration rate  
260 synthesized less denitrification reductases than those with “fast” respiration rate during the  
261 first 20 h. The relative abundances of the different reductases also differed between the two  
262 phenotypes. In cultures with “slow” respiration, NosZ was significantly more abundant than  
263 Nap and Nir ( $p < 0.01$ ), which were comparable (Fig. 5E). Cultures with “fast” respiration instead

264 contained higher abundancies of NosZ and Nir compared to Nap at 5 h. After this, the  
265 abundance of Nir increased more than that of the others and at 20 h the LFQ of Nir was  $0.20 \pm$   
266  $0.07$ , while the abundancies of NosZ and Nap were approximately half of that (Fig. 5F). After  
267 addition of carbon substrate to the cultures with “slow” respiration, a rapid synthesis of all  
268 three reductases took place. This synthesis was most prominent for Nir which, after a couple of  
269 hours, had increased three-fold, reaching a relative abundance that was twice as high as Nap  
270 and NosZ (Fig. 5E), resembling the abundance profile of the cultures with “fast” respiration (Fig.  
271 5F).

272

## 273 Discussion

274 Detailed eco-physiological studies during the past decades have revealed several aspects of  
275 how the denitrification process is regulated in different organisms (6,13,39). Most of this  
276 knowledge is, however, based on laboratory studies where cultures have been grown under  
277 optimal conditions, while less attention has been paid to understanding how denitrification,  
278 and particularly the release of  $N_2O$ , is affected if cells are starved, which is the normal state of  
279 cells in most natural environments. We focused on how starvation, i. e. lack of carbon substrate,  
280 affects denitrification and  $N_2O$  release. The general notion has been that  $N_2O$  reductase is less  
281 competitive for electrons than the other denitrification reductases, leading to emissions of  $N_2O$   
282 when the availability of electron donors is low. This is largely based on a single study of  
283 *Alcaligenes faecalis* (40) and has been supported by some studies of complex communities but  
284 contested by others (41-43). *A. faecalis* can perform partial denitrification reducing  $NO_2^-$  to  $N_2$   
285 using NirK, cNor and NosZ clade I, but this organism lacks dissimilatory  $NO_3^-$  reductases (Nar or

286 Nap). The study by Schalk-Otto (40), performed in continuous cultures, showed increased N<sub>2</sub>O  
287 release under low substrate concentrations, and it was suggested that N<sub>2</sub>O reductase did not  
288 compete successfully with the other reductases for electrons from cytochrome *c*, possibly due  
289 to lower affinity for the electron donor. This conclusion needs, however, further verification by  
290 more detailed studies of the mechanism involved. Moreover, such studies need to be extended  
291 to other groups of denitrifying microorganisms and should include organisms carrying a  
292 complete denitrification pathway (thus with Nar and/or Nap). Research over the past decades  
293 has revealed diverse denitrification phenotypes among even closely related bacteria, with  
294 implications for their accumulation of denitrification intermediate products (15,44).

295 The phenotype described for a range of taxonomically diverse *Bradyrhizobium* strains with a  
296 complete denitrification pathway is characterized by a strong preference for N<sub>2</sub>O over NO<sub>3</sub><sup>-</sup>  
297 when grown in full-strength YMB medium under denitrifying conditions (18,19). The present  
298 study provides compelling evidence that this preference is retained when the organisms are  
299 starved for carbon and energy, with practically no electron flow to Nap when N<sub>2</sub>O was present  
300 (Figs. 2A-D). This was not due to too low levels of Nap since the cultures showed well-  
301 functioning Nap activity if NO<sub>3</sub><sup>-</sup> was provided as the only initial electron acceptor (Fig. 3A).  
302 Further evidence for this was obtained from the proteomics results, which showed that the  
303 cultures, even when grown under more severe starvation conditions using Bioassay 2, were  
304 able to produce comparable amounts of Nap, Nir and Nos (Figs. 5E and F). Therefore, the lack of  
305 NO<sub>3</sub><sup>-</sup> reduction during the period when there was N<sub>2</sub>O in the system could not be explained by a  
306 lack of Nap molecules. Instead, the results suggest the same metabolic-level phenomenon as

307 found for well-fed cultures in this study (Fig. 2A) and earlier (18,19), where NosZ outcompetes  
308 Nap for electrons, leaving Nap virtually without electrons so long as exogenous N<sub>2</sub>O is available.

309 The attempt to tweak the electron flow toward Nap by the addition of TMPD and ascorbate  
310 did not result in measurable NO<sub>3</sub><sup>-</sup> reduction in the starved cultures (Fig. 4A). A recent study by  
311 Mania et al. (18) demonstrated that well-fed *Bradyrhizobium* cells did reduce some NO<sub>3</sub><sup>-</sup> in the  
312 presence of N<sub>2</sub>O, if provided with TMPD and ascorbate. This suggested that NosZ (as well as Nir  
313 and Nor) received electrons from strongly reduced cytochrome *c*, thus bypassing the electron  
314 flow via the *bc1* complex, which allowed Nap to receive electrons from quinol, delivered from  
315 the TCA cycle. The specificity of the electron delivery from TMPD to cytochrome *c* cannot be  
316 taken for granted, however, and the result by Mania et al. (18) could instead reflect a minimum  
317 of electron flow from TPMD to quinon or to NapC, directly, or indirectly. In the present  
318 experiment with starved cells, TMPD + ascorbate failed to induce measurable electron flow to  
319 Nap in the presence of N<sub>2</sub>O (Fig. 4B). This probably reflects the marginal electron flow from the  
320 TCA cycle to the quinon/quinol pool due to starvation. A separate experiment supported this,  
321 showing that when carbon substrate (YMB) was added to starved cultures, this provided  
322 enough electrons to support some Nap activity, although NosZ activity still dominated (Fig. S3).

323 At the same time, the result refutes the concerns regarding unspecific electron delivery of  
324 electrons from TMPD to quinon. Functional Nap was apparently present, and NO<sub>3</sub><sup>-</sup> reduction  
325 started when N<sub>2</sub>O was almost depleted, with  $V_{eNap}$  being 2 fmol e<sup>-</sup> cell<sup>-1</sup> h<sup>-1</sup> which was twice as  
326 high as  $V_{eNir/Nor}$  (Fig. 4B). The latter is as expected, since the reduction of 1 mole of NO<sub>3</sub><sup>-</sup> to NO<sub>2</sub><sup>-</sup>  
327 requires 2 mole electrons, while reduction of NO<sub>2</sub><sup>-</sup> and NO requires 1 mole electrons.  
328 Furthermore, the electron flow to NosZ was the same as to Nir and Nor, suggesting that Nir and

329 NosZ competed equally well for electrons from cytochrome *c*. The maximum total electron flow  
330 of 13-14 fmol e<sup>-</sup> cell<sup>-1</sup> h<sup>-1</sup> when the cytochrome *c* pool was saturated with electrons from TMPD  
331 is likely to be close to the maximum capacity of the denitrification pathway. This electron flow  
332 rate is higher than the total electron flow rate in the well-fed cells, which was 8-10 fmol e<sup>-</sup> cell<sup>-1</sup>  
333 h<sup>-1</sup> (Fig. 2C). The factor limiting  $V_{eNos}$  to 13-14 fmol cell<sup>-1</sup> h<sup>-1</sup> is plausibly the rate of electron  
334 delivery from cytochrome *c* and/or  $k_{cat}$  for Nos.

335 In another experiment we added YMB medium to “slow respiration” phenotypes of the  
336 cultures that had been exposed to extended starvation (Figs. 5A, C and E). These cultures had  
337 some NosZ activity ( $V_{eNos}$  0.1-0.3 fmol e<sup>-</sup> cell<sup>-1</sup> h<sup>-1</sup>), while Nap and Nir activities could not be  
338 detected. Addition of the electron donor (YMB) led to an immediate upshoot in the activities of  
339 all reductases. This could not have been the case if the reductases were not present already,  
340 which was proven by the proteomics results. Taken together, the results support that the  
341 absolute preference for N<sub>2</sub>O over NO<sub>3</sub><sup>-</sup> was due to competition for electrons, also under severe  
342 starvation conditions.

343 It is well known that bacteria have developed a range of physiological responses to tackle  
344 starvation. Some survive by forming spores, but most bacteria survive by strongly reduced  
345 metabolic rates and minimizing the synthesis of some proteins while upregulating others such  
346 as genes for high-affinity transporters, essential repair mechanisms and alternative energy  
347 sources (3,45,46). Some such changes have been observed in rhizobia belonging to *Rhizobium*  
348 *leguminosarum*, which stayed viable for long periods (55 days) of C starvation (47). Changes in  
349 cell size are common during long-term starvation, sometimes leading to the formation of small  
350 or even ultra-microcells which may have increased tolerance to antibiotics and other stresses



351 (2,46). Another way for many bacteria, including rhizobia, to survive is to use carbon stored as  
352 polyhydroxyalkanoates (PHA) or glycogen, formed during periods of ample nutrient abundance  
353 (48). In the present study, the metabolic activity, measured as anaerobic respiration rate,  
354 decreased to between 1 and 18% that of well-fed cultures, depending on which starvation  
355 bioassay was used. We did not, however, detect any obvious decrease in cell size when  
356 comparing cells starved for 24 h, although cell morphologies were slightly altered (Figs. S1A and  
357 B). PHA was observed in the starved cells as well as well-fed ones, as shown with Nile red  
358 staining (Fig. S1A) and no obvious reduction in PHA could be observed during starvation from  
359 our assays. Since this was a comparably short period of starvation, it is conceivable that the  
360 cells would make use of the stored carbon if the starvation was prolonged. It could be  
361 speculated that one reason for not using the PHA reserves (and glycogen) immediately, is that  
362 these are saved to be used during bacteroid formation (48). To clarify these issues, more  
363 detailed studies are however needed.

364 A striking separation into two phenotypes during starvation, as shown in Fig. 5, was  
365 observed in repeated experiments (Bioassay 2), each time with about two thirds of the flasks  
366 showing a “fast” and the others “slow” respiration:  $1.0\text{-}1.8 \text{ fmol e}^- \text{ cell}^{-1} \text{ h}^{-1}$  vs  $0.1\text{-}0.3 \text{ fmol e}^-$   
367  $\text{cell}^{-1} \text{ h}^{-1}$ , respectively. Phenotypic heterogeneity has been observed in single-strain cultures of  
368 various bacteria when exposed to carbon substrate deficiency and may, or may not, be due to  
369 mutations during starvation for one week or more (3,49). Mutations in the entire population in  
370 several replicate flasks are unlikely and cannot, however, have caused the rapid diversification  
371 into “slow”- or “fast” respiration in the present study. It may instead reflect a stochastic  
372 phenomenon, or that the culture contained different subpopulations. We speculated that the

373 “fast respiration” phenotype may be due to a fraction of the cells dying, allowing the other cells  
374 to survive on nutrients released from lysed cells, as seen for other bacteria (3). However, this  
375 would require lysis of a substantial fraction of the cells, which is refuted by the observation that  
376 the flasks with “slow” and “fast” phenotypes had practically identical numbers of viable cells  
377 (Fig. S2). Thus, further studies are needed to understand this phenomenon of different  
378 respiration rates.

379 Although the starvation bioassays developed for this study cannot be regarded as a close  
380 mimicking of the conditions in natural environments, it is conceivable from the experiments  
381 that these organisms are potentially strong sinks for N<sub>2</sub>O when living in soil under fluctuating  
382 availability of carbon substrate. Bioassay 1 is probably closer to a “real-world” situation than  
383 Bioassay 2, since it is likely that denitrifying bacteria experience regular fluctuations in oxygen  
384 and thus are not devoid of denitrification reductases if they enter starvation. On the other hand,  
385 Bioassay 2, where the cells had to produce the denitrification proteome in the absence of  
386 external electron donors (C-substrate), showed that even under these conditions N<sub>2</sub>O reduction  
387 strongly dominated over NO<sub>3</sub><sup>-</sup> reduction.

388

## 389 **Materials and methods**

390 **Bacterial strain and culture preparations.** *Bradyrhizobium* strain HAMBI 2125, originally  
391 isolated from nodules of *Arachis hypogaea* growing in Sichuan, China (50), was used in all  
392 experiments. This strain, which is closely related to *Bradyrhizobium ottawaense*, contains the  
393 genetic set-up for complete denitrification (19). A culture was raised from one single colony  
394 after streaking on agar plates. After checking the purity by sequencing the 16S rRNA gene (19),

395 portions were preserved in 15% glycerol at -80 °C. Cultures for all the experiments were started  
396 from the -80 °C stocks and raised under fully oxic conditions in 120 ml serum flasks containing  
397 50 ml Yeast Mannitol Broth (YMB): 10 g l<sup>-1</sup> D-Mannitol, 0.5 g l<sup>-1</sup> K<sub>2</sub>HPO<sub>4</sub>, 0.2 g l<sup>-1</sup> MgSO<sub>4</sub>·7H<sub>2</sub>O,  
398 0.1 g l<sup>-1</sup> NaCl and 0.5 g l<sup>-1</sup> yeast extract (51). All incubations were done at 28 °C. Medical flasks  
399 (120 ml) were used in all experiments. A magnet in each flask secured vigorous stirring (600-  
400 700 rpm) to avoid cell aggregation and to optimize the gas exchange between liquid and gas  
401 phases (18). To prevent that the cells experienced anoxia during this oxic incubation, and thus  
402 to avoid de novo synthesis of denitrification reductases, portions were regularly transferred to  
403 new flasks containing fresh medium, so that the OD<sub>600</sub> was never allowed to exceed 0.1 (19).  
404 These aerobically grown cultures were used as inoculants in the “starvation bioassays”  
405 described below.

406 Flasks for cultures incubated under hypoxic conditions were prepared as described in (18).  
407 Briefly, flasks (120 ml) containing 50 ml buffer (or medium) were capped with sterilized, gas  
408 tight butyl rubber septa (Matrix AS, Norway). The air was removed by applying vacuum  
409 repeatedly (6 x 360 s) and He was then filled for 30 s, after which the overpressure was  
410 released. The flasks were left for two days to equilibrate the gases between the headspace and  
411 liquid (52). Then, 0.7 ml or 1 ml O<sub>2</sub> (equal to 1 or 1.5 vol %) and 1 ml N<sub>2</sub>O (70 to ~80 μmol N  
412 flask<sup>-1</sup>) was injected into the headspace and sterile filtered solutions of KNO<sub>3</sub> (and sometimes  
413 KNO<sub>2</sub>) were added to the liquid reaching initial, desired concentrations (0.25 -1 mM).

414

415 **Starvation bioassays.** Starvation bioassays were established, which followed one of the  
416 procedures described in Fig. 1. In Bioassay 1 “Mild starvation”, cultures were allowed to make

417 the transition to denitrification in full-strength YMB before being exposed to starvation. Oxically  
418 grown, well-fed cultures were incubated for 48 h after which the headspace was replaced by He  
419 and 1% O<sub>2</sub>, and 1 mM KNO<sub>3</sub> was added to the medium. When O<sub>2</sub> was depleted, the cultures  
420 were centrifuged (10 000 × g at 4 °C for 10 min) and washed twice in sterile ddH<sub>2</sub>O. The pellets  
421 (triplicates) were pooled to reduce bias in the form of variations due to the  
422 centrifugation/washing. Each pellet was divided into three and used to inoculate anoxic flasks  
423 containing 50 ml C-free buffer supplemented with 1 mM KNO<sub>3</sub> and 0.25 or 0.5 mM KNO<sub>2</sub> and  
424 with He and/or 1 ml N<sub>2</sub>O (around 80 μmol N flask<sup>-1</sup>) in the headspace. When incubated in the  
425 buffer, the respiration rate of the cultures was 10-18% that of well-fed cultures during the first  
426 15 h, then it decreased to about 4%.

427 In Bioassay 2 (“extended starvation”), denitrification was instead induced after having  
428 exposed the cells to starvation for 20 h. The cultures were raised in fully oxic flasks containing  
429 YMB medium. When OD<sub>600</sub> reached ~0.1, the cultures were centrifuged (10 000 × g at 4 °C for  
430 10 mins) and washed twice in sterile ddH<sub>2</sub>O. The pellets (triplicates) were pooled after which  
431 they were evenly divided and used to inoculate fully oxic flask containing C-free “starvation  
432 buffer”. These cultures were incubated for 20 h, then centrifuged after which the pellets were  
433 pooled and divided evenly before being inoculated into flasks containing C-free “starvation  
434 buffer” with 1 mM KNO<sub>3</sub>, and with He and 1 ml N<sub>2</sub>O (around 80 μmol N flask<sup>-1</sup>) in headspace.  
435 The respiration rate of cultures exposed to “extended starvation” was ca 1-4% compared to  
436 that of well-fed cultures. Results from the different starvation bioassays were compared to  
437 those from well-fed cultures. To avoid biases, the treatments, which were in all cases set up at  
438 least in triplicates (n ≥ 3), were the same regarding centrifugations and washings until the last

439 step when pooled cells were inoculated to anoxic flasks containing either YMB or buffer. The  
440 carbon source in the YMB medium comprised >200 times surplus of electron donor compared  
441 to electron acceptors throughout all incubations, thus ensuring that the electron donor was not  
442 depleted. All cultures were incubated at 28°C, and with vigorous stirring (600-700 rpm).

443  
444 **Addition of YMB medium or TMPD as electron donors to starved cultures.** Experiments  
445 were performed to investigate how starved cultures of *Bradyrhizobium* strain HAMBI 2125  
446 responded to the addition of an electron donor, either provided as an artificial electron donor  
447 (Fig. 4) or as YMB medium (2 ml mannitol /yeast solution providing them with a substrate  
448 concentration corresponding to half-strength YMB, thus 5 g mannitol and 0.25 g yeast l<sup>-1</sup>, Fig. 5).  
449 As artificial electron donor we used sodium TMPD (N, N, N', N'-tetramethyl-p-  
450 phenylenediamine) which, in the presence of ascorbate, donates electrons to cytochrome c  
451 thus providing electrons to Nir and NosZ (18,37). Ascorbate and TMPD (both from Sigma-  
452 Aldrich®, Germany) were dissolved in ddH<sub>2</sub>O or 96% ethanol, respectively, and filter sterilized.  
453 The solutions were added to the incubation flasks 10-15 mins before gas sampling. The effect of  
454 different concentrations of TMPD (100, 250, and 500 µM in the culture buffer) combined with  
455 10 mM ascorbate on N<sub>2</sub>O reduction was checked prior to the main experiments. This showed  
456 that 500 µM TMPD had an obvious inhibition effect on N<sub>2</sub>O reduction, while 100 µM and 250  
457 µM showed no inhibitory effect (not shown). To minimize other, possible effects we used 100  
458 µM TMPD for the experiments (as done in Mania et al. (18)). In another experiment, shown in  
459 Fig. S3, 4 ml of a mannitol/yeast solution was added to flasks containing 50 ml starved cultures,

460 providing them with a substrate concentration corresponding to full strength YMB (10 g  
461 mannitol and 0.5 g yeast l<sup>-1</sup>).

462

463 **Monitoring of gas kinetics, NO<sub>3</sub><sup>-</sup> and NO<sub>2</sub><sup>-</sup> concentrations and electron flow rates.** The  
464 culture flasks were placed in a robotized incubation system and the headspace gas was sampled  
465 frequently for N<sub>2</sub>, N<sub>2</sub>O, NO and O<sub>2</sub> measurements (34). Gas losses caused by sampling were  
466 taken into account when calculating the production and consumption of gases, as described by  
467 Molstad et al. (34) and Mania et al. (18). The concentration of O<sub>2</sub> in the anoxic incubation flasks  
468 was <0.6 μM at the start of the experiment, which was well below the level for initiating  
469 denitrification (4.6 μM; (19)).

470 The NO<sub>2</sub><sup>-</sup> concentrations were monitored as described in Mania et al. (18). Briefly, samples  
471 (0.1- 0.5 ml) were taken every 1 or 2 hours (n=3) from the liquid phase through the septum of  
472 the flasks using a sterile syringe. To avoid that the gas kinetics was affected by the sampling, a  
473 set of flasks was dedicated to NO<sub>2</sub><sup>-</sup> measurements and a parallel set was left untouched for gas  
474 measurements. NO<sub>2</sub><sup>-</sup> was determined using a chemoluminescence NOx analyzer (Sievers NOA™  
475 280i, GE Analytical Instruments) after at first reducing the NO<sub>2</sub><sup>-</sup> to NO by adding 10 μl liquid  
476 sample into a purging device containing a reducing agent (50% acetic acid with 1% (w/v) NaI)  
477 (53,54). The NO<sub>2</sub><sup>-</sup> concentrations were determined against a standard curve (range 0-2 mM  
478 NO<sub>2</sub><sup>-</sup>; r<sup>2</sup>= 0.999).

479 The cell specific electron flow rates ( $V_e$ , mol e<sup>-</sup> cell<sup>-1</sup> h<sup>-1</sup>) for each time increment between  
480 two gas samplings were calculated as  $V_{eflask}(t)/(N(0)+E_{cum}(t)*Y)$ , where  $V_{eflask}(t)$  is the electron  
481 flow rate in the flask (mol e<sup>-</sup> flask<sup>-1</sup> h<sup>-1</sup>) calculated from measurements,  $N(0)$  is number of cells in

482 the flask at time=0,  $E_{cum}(t)$  is the cumulated electron flow ( $\text{mol e}^- \text{flask}^{-1}$ ) at time=t, and Y is the  
483 yield per mol electron ( $\text{cells mol}^{-1} \text{e}^-$ ) for HAMBI 2125 as measured previously (19). The  
484 conversion factor  $5.8\text{E}8 \text{ cells ml}^{-1} * \text{OD}_{600}^{-1}$  was used to convert  $\text{OD}_{600}$  to cell numbers (19).

485

486 **Proteomics.** The abundances of Nap, Nir and NosZ were quantified in starved cultures  
487 treated as described for Bioassay 2 (extended starvation). Altogether eighteen flasks were  
488 prepared according to Fig. 1B. After the 20 h aerobic incubation in C-free buffer, three flasks  
489 were harvested for proteomics analysis and, following centrifugation/washing, the three cell  
490 pellets from these flasks were frozen individually at  $-20^\circ\text{C}$ . The cultures in the other flasks were  
491 pooled three by three and after centrifugation/washing, each cell pellet was divided in three  
492 and used to inoculate new flasks containing C-free buffer with  $\text{NO}_3^-$  in the liquid and with He  
493 and 1 ml  $\text{N}_2\text{O}$  in the headspace (Fig. 1B). These flasks (fifteen in total) were placed in the robotic  
494 incubation system for monitoring of gas kinetics and  $\text{NO}_2^-$  concentrations as described above.  
495 The entire culture volume (50 ml) was harvested from each of triplicate flasks at different time  
496 points during the anoxic incubation. The cultures in six of the flasks showed a “fast” respiration  
497 rate (total electron flow  $1.0\text{-}1.8 \text{ e}^- \text{ cell}^{-1} \text{ h}^{-1}$ ) and were harvested at 5 and 20 h of incubation in  
498 anoxic buffer (triplicates at each sampling point). The cultures in the other nine flasks showed a  
499 “slow” respiration rate (maximum total electron flow rate was  $0.27 \text{ fmol e}^- \text{ cell}^{-1} \text{ h}^{-1}$ ). Six of  
500 them were harvested in triplicates after 10 and 20 h in anoxic buffer. The remaining three flasks  
501 from the cultures with “slow” respiration rate received a portion of YMB at 24.8 h and were  
502 harvested at 27 h. Harvested cell cultures were centrifuged and stored as pellets at  $-20^\circ\text{C}$ . The  
503 protein extraction was as described in Gao et al. (19). Briefly, the thawed cell pellets were

504 resuspended in lysis buffer (20 mM Tris–HCl pH 8, 0.1% v/v Triton X-100, 200 mM NaCl, 1 mM  
505 DTT). They were then subjected to bead beating (3 × 45 s) with glass beads (particle size ≤ 106  
506 μm; Sigma) using a MP Biomedicals™ FastPrep-24™ (Thermo Fischer Scientific) at maximum  
507 power and with cooling on ice between the cycles. After centrifugation to remove cell debris  
508 (10 000 × g; 5 min), the supernatant, containing water soluble proteins, was used for proteomic  
509 analysis using an Orbitrap mass spectrometer (described in (19,55)). Quantification was based  
510 on LFQ (label-free quantification) in MaxQuant (56), and the relative abundance of the  
511 individual reductases was calculated as percentages of the sum of all protein abundances for  
512 each time point. The nitric oxide reductases NorB/C were not measured since only a small  
513 fraction of these membrane-bound enzymes can be accurately obtained with this extraction  
514 protocol (approximately 1/1000<sup>th</sup> the quantity of the other reductases).

515

516 **Viable counts and microscopy.** The number of viable cells in starved cultures showing slow  
517 and fast respiration rates, observed in flasks prepared according to Bioassay 2, was determined  
518 by plating dilutions of the cultures on yeast-mannitol agar (YMA). The morphology of cells from  
519 well-fed cultures and starved cultures was compared using phase contrast microscopy and a  
520 qualitative determination (presence/absence) of PHA was done by staining with Nile Red  
521 (Sigma-Aldrich) followed by fluorescence microscopy. Microscopy was performed on a Zeiss  
522 AxioObserver with an Orca-Flash4.0 CMOS camera (Hamamatsu Photonics) controlled by the  
523 ZEN Blue software. Images were taken with a 100x phase contrast objective. A HPX-120  
524 Illuminator was used as light source for fluorescence microscopy. Images were prepared using  
525 ImageJ and analysis of cell sizes was done using the ImageJ-plugin MicrobeJ (57).



526

## 527 **Acknowledgment**

528 This project was supported by Kingenta Ecological Engineering Group Co., LTD and by the  
529 project PASUSI financed by the EC Horizon2020 ERA-NET Cofund Programme, Grant agreement  
530 No. 727715 and by the Research Council of Norway, projects No. 290488 and 325770. Yuan Gao  
531 is grateful to the China Scholarship Council (CSC) for financial support. We thank Gro Stamsås  
532 for help with microscopy.

533

## 534 **References**

- 535 1. Hobbie JE, Hobbie EA. 2013. Microbes in nature are limited by carbon and energy: The  
536 starving-survival lifestyle in soil and consequences for estimating microbial rates. *Front*  
537 *Microbiol* 4:324.
- 538 2. Morita RY. 1990. The starvation-survival state of microorganisms in nature and its  
539 relationship to the bioavailable energy. *Experientia* 46:813–817.
- 540 3. Bergkessel M, Basta DW, Newman DK. 2016. The physiology of growth arrest: Uniting  
541 molecular and environmental microbiology. *Nat Rev Microbiol* 14:549–562.
- 542 4. Ratcliff WC, Kadam SV, and Denison, R.F. 2008. Poly-3-hydroxybutyrate (PHB) supports  
543 survival and reproduction in starving rhizobia. *FEMS Microbiol Ecol* 65:391–399.
- 544 5. Müller-Santos M, Koskimäki JJ, Alves LPS, de Souza EM, Jendrossek D, Pirttilä AM. 2021. The  
545 protective role of PHB and its degradation products against stress situations in bacteria.  
546 *FEMS Microbiol Rev* 45:fuaa058.

- 547 6. Zumft WG. 1997. Cell biology and molecular basis of denitrification. *Microbiol Mol Biol Rev*  
548 61:533–616.
- 549 7. Duffner C, Kublik S, Fösel B, Frostegård Å, Schloter M, Bakken L, Schulz S. 2022. Genotypic  
550 and phenotypic characterization of hydrogenotrophic denitrifiers. *Environ Microbiol*  
551 24:1887-1901.
- 552 8. Schneider LK, Wüst A, Pomowski A, Zhang L, Einsle O. 2014. No laughing matter: The  
553 unmaking of the greenhouse gas dinitrogen monoxide by nitrous oxide reductase. *Met Ions*  
554 *Life Sci* 14:177–210.
- 555 9. Hein S, Simon J. 2019. Bacterial nitrous oxide respiration: electron transport chains and  
556 copper transfer reactions. *Adv Microb Physiol* 75:137–175.
- 557 10. Shapleigh JP. 2013. Denitrifying prokaryotes: Prokaryotic Physiology and Biochemistry. In  
558 Rosenberg E, DeLong EF, Lory S, Stackebrandt E, Thompson F. (eds), *The prokaryotes*, pp.  
559 405-425. Berlin, Heidelberg: Springer.
- 560 11. Graf DRH, Jones CM, Hallin S. 2014. Intergenomic comparisons highlight modularity of the  
561 denitrification pathway and underpin the importance of community structure for N<sub>2</sub>O  
562 emissions. *PLoS ONE* 9:e114118.
- 563 12. Richardson D, Felgate H, Watmough N, Thomson A, Baggs E. 2009. Mitigating release of the  
564 potent greenhouse gas N<sub>2</sub>O from the nitrogen cycle - could enzymic regulation hold the key?  
565 *Trends Biotechnol* 27:388-97.
- 566 13. Spiro S. 2012. Nitrous oxide production and consumption: regulation of gene expression by  
567 gas-sensitive transcription factors. *Philos Trans R Soc Lond B Biol Sci* 367:1213-25.

- 568 14. Liu B, Frostegård Å, Bakken LR. 2014. Impaired reduction of N<sub>2</sub>O to N<sub>2</sub> in acid soils is due to  
569 a posttranscriptional interference with the expression of *nosZ*. *mBio* 5:e01383-14.
- 570 15. Liu B, Mao Y, Bergaust L, Bakken LR, Frostegård A. 2013. Strains in the genus *Thauera*  
571 exhibit remarkably different denitrification regulatory phenotypes. *Environ Microbiol*  
572 15:2816-28.
- 573 16. Gaimster H, Alston M, Richardson DJ, Gates AJ, Rowley G. 2018. Transcriptional and  
574 environmental control of bacterial denitrification and N<sub>2</sub>O emissions. *FEMS Microbiol Lett*  
575 365:fnx277.
- 576 17. Lycus P, Soriano-Laguna MJ, Kjos M, Richardson DJ, Gates AJ, Milligan DA, Frostegård Å,  
577 Bergaust L, Bakken LR. 2018. A bet-hedging strategy for denitrifying bacteria curtails their  
578 release of N<sub>2</sub>O. *Proc Natl Acad Sci* 115:11820–11825.
- 579 18. Mania D, Woliy K, Degefu T, Frostegård Å. 2020. A common mechanism for efficient N<sub>2</sub>O  
580 reduction in diverse isolates of nodule-forming bradyrhizobia. *Environ Microbiol* 22:17–31.
- 581 19. Gao Y, Mania D, Mousavi SA, Lycus P, Arntzen M, Woliy K, Lindström K, Shapleigh JP, Bakken  
582 LR, Frostegård Å. 2021. Competition for electrons favours N<sub>2</sub>O reduction in denitrifying  
583 *Bradyrhizobium* isolates. *Environ Microbiol* 23:2244–2259.
- 584 20. Butterbach-Bahl K, Baggs EM, Dannenmann M, Kiese R, Zechmeister-Boltenstern S. 2013.  
585 Nitrous oxide emissions from soils: How well do we understand the processes and their  
586 controls? *Philos Trans R Soc Lond B Biol Sci* 368:20130122.
- 587 21. Thompson RL, Lassaletta L, Patra PK, Wilson C, Wells KC, Gressent A, Koffi EN, Chipperfield  
588 M, Winiwarter W, Davidson EA, Tian H, Canadell JG. 2019. Acceleration of global N<sub>2</sub>O  
589 emissions seen from two decades of atmospheric inversion. *Nat Clim Change* 9:993–998.

- 590 22. Tian H, Lu C, Ciais P, Michalak AM, Canadell JG, Saikawa E, Huntzinger DN, Gurney KR, Sitch  
591 S, Zhang B, Yang J, Bousquet P, Bruhwiler L, Chen G, Dlugokencky E, Friedlingstein P, Melillo  
592 J, Pan S, Poulter B, Prinn R, Saunois M, Schwalm CR, Wofsy SC. 2016. The terrestrial  
593 biosphere as a net source of greenhouse gases to the atmosphere. *Nature* 531:225–228.
- 594 23. Tian H, Xu R, Canadell JG, Thompson RL, Winiwarter W, Suntharalingam P, Davidson EA,  
595 Ciais P, Jackson RB, Janssens-Maenhout G, Prather MJ, Regnier P, Pan N, Pan S, Peters GP,  
596 Shi H, Tubiello FN, Zaehle S, Zhou F, Arneeth A, Battaglia G, Berthet S, Bopp L,  
597 Bouwman AF, Buitenhuis ET, Chang J, Chipperfield MP, Dangal, SRS, Dlugokencky E,  
598 Elkins JW, Eyre BD, Fu B, Hall B, Ito A, Joos F, Krummel PB, Landolfi A, Laruelle GG,  
599 Lauerwald R, Li W, Lienert S, Maavara T, MacLeod M, Millet DB, Olin S, Patra PK, Prinn RG,  
600 Raymond PA, Ruiz DJ, van der Werf GR, Vuichard N, Wang J, Weiss RF, Wells KC, Wilson  
601 C, Yang J, Yao Y. 2020. A comprehensive quantification of global nitrous oxide sources and  
602 sinks. *Nature* 586: 248–256.
- 603 24. Davidson EA, Kanter D. 2014. Inventories and scenarios of nitrous oxide emissions. *Environ*  
604 *Res Lett* 9:105012.
- 605 25. Bakken LR, Frostegård Å. 2020. Emerging options for mitigating N<sub>2</sub>O emissions from food  
606 production by manipulating the soil microbiota. *Curr Opin Environ Sustain* 47:89–94.
- 607 26. Jensen ES, Peoples MB, Boddey RM, Gresshoff PM, Henrik HN, Alves BJR, Morrison MJ. 2012.  
608 Legumes for mitigation of climate change and the provision of feedstock for biofuels and  
609 biorefineries. A review. *Agron Sustain Dev* 32:329-364.
- 610 27. Poole P, Ramachandran V, Terpolilli J. 2018. Rhizobia: From saprophytes to endosymbionts.  
611 *Nat Rev Microbiol* 16:291–303.

- 612 28. Hénault C, Revellin C. 2011. Inoculants of leguminous crops for mitigating soil emissions of  
613 the greenhouse gas nitrous oxide. *Plant Soil* 346:289–296.
- 614 29. Itakura M, Uchida Y, Akiyama H, Hoshino YT, Shimomura Y, Morimoto S, Tago K, Wang Y,  
615 Hayakawa C, Uetake Y, Sánchez C, Eda S, Hayatsu M, Minamisawa K. 2013. Mitigation of  
616 nitrous oxide emissions from soils by *Bradyrhizobium japonicum* inoculation. *Nat Clim*  
617 *Change* 3:208–212.
- 618 30. Jaiswal SK, Dakora FD. 2019. Widespread distribution of highly adapted *Bradyrhizobium*  
619 species nodulating diverse legumes in Africa. *Front Microbiol* 10:310.
- 620 31. Woliy K, Degefu T, Frostegård Å. 2019. Host Range and Symbiotic Effectiveness of N<sub>2</sub>O  
621 Reducing Bradyrhizobium Strains. *Front Microbiol* 10:2746.
- 622 32. Bedmar EJ, Robles EF, Delgado MJ. 2005. The complete denitrification pathway of the  
623 symbiotic, nitrogen-fixing bacterium *Bradyrhizobium japonicum*. *Biochem Soc Trans* 33:141-  
624 144.
- 625 33. Narozna D, Pudełko K, Króliczak J, Golińska B, Sugawara M, Mądrzak CJ, Sadowsky MJ. 2015.  
626 Survival and competitiveness of *Bradyrhizobium japonicum* strains 20 years after  
627 introduction into field locations in Poland. *Appl Environ Microbiol* 81:5552–5559.
- 628 34. Molstad L, Dörsch P, Bakken LR. 2007. Robotized incubation system for monitoring gases  
629 (O<sub>2</sub>, NO, N<sub>2</sub>O, N<sub>2</sub>) in denitrifying cultures. *J Microbiol Methods* 71:202–211.
- 630 35. Lim NYN, Frostegård Å, Bakken LR. 2018. Nitrite kinetics during anoxia: The role of abiotic  
631 reactions versus microbial reduction. *Soil Biol Biochem* 119:203–209.
- 632 36. Spiekermann P, Rehm BH, Kalscheuer R, Baumeister D, Steinbüchel A. 1999. A sensitive,  
633 viable-colony staining method using Nile red for direct screening of bacteria that

- 634 accumulate polyhydroxyalkanoic acids and other lipid storage compounds. Arch Microbiol  
635 171:73-80.
- 636 37. Kimelberg HK, Nicholls P. 1969. Kinetic studies on the interaction of TMPD with cytochrome  
637 c and cytochrome c oxidase. Arch Biochem Biophys 133:327–335.
- 638 38. Bueno E, Richardson DJ, Bedmar EJ, Delgado MJ. 2009. Expression of *Bradyrhizobium*  
639 *japonicum* cbb3 terminal oxidase under denitrifying conditions is subjected to redox control.  
640 FEMS Microbiol Lett 298:20–28.
- 641 39. Torres MJ, Simon J, Rowley G, Bedmar EJ, Richardson DJ, Gates AJ, Delgado MJ. 2016.  
642 Nitrous Oxide Metabolism in Nitrate-Reducing Bacteria: Physiology and Regulatory  
643 Mechanisms. Adv Microb Physiol 68:353-432.
- 644 40. Schalk-Otte S, Seviour R, Kuenen J, Jetten MSM. 2000. Nitrous oxide (N<sub>2</sub>O) production by  
645 *Alcaligenes faecalis* during feast and famine regimes. Water Res 34:2080-2088.
- 646 41. Itokawa H, Hanaki K, Matsuo T. 2001. Nitrous oxide production in high-loading biological  
647 nitrogen removal process under low COD/N ratio condition. Water Res 35:657-664.
- 648 42. Lu H, Chandran K. 2010. Factors promoting emissions of nitrous oxide and nitric oxide from  
649 denitrifying sequencing batch reactors operated with methanol and ethanol as electron  
650 donors. Biotechnol Bioeng 106:390-8.
- 651 43. Pan Y, Ni BJ, Bond PL, Ye L, Yuan Z. 2013. Electron competition among nitrogen oxides  
652 reduction during methanol-utilizing denitrification in wastewater treatment. Water Res  
653 47:3273-81.

- 654 44. Lycus P, Bøthun KL, Bergaust L, Shapleigh JP, Bakken LR, Frostegård Å. 2017. Phenotypic and  
655 genotypic richness of denitrifiers revealed by a novel isolation strategy. ISME J 11:2219–  
656 2232.
- 657 45. Kjelleberg S, Albertson N, Flärdh K, Holmquist L, Jouper-Jaan A, Marouga R, Ostling J,  
658 Svenblad B, Weichart D. 1993. How do non-differentiating bacteria adapt to starvation?  
659 Antonie Van Leeuwenhoek 63:333-41.
- 660 46. Gray DA, Dugar G, Gamba P, Strahl H, Jonker MJ, Hamoen LW. 2019. Extreme slow growth  
661 as alternative strategy to survive deep starvation in bacteria. Nat Commun 10:890.
- 662 47. Thorne SH, Williams HD. 1997. Adaptation to nutrient starvation in *Rhizobium*  
663 *leguminosarum* bv. *phaseoli*: analysis of survival, stress resistance, and changes in  
664 macromolecular synthesis during entry to and exit from stationary phase. J Bacteriol  
665 179:6894-901.
- 666 48. Ludwig EM, Leonard M, Marroqui S, Wheeler TR, Findlay K, Downie JA, Poole PS. 2005. Role  
667 of polyhydroxybutyrate and glycogen as carbon storage compounds in pea and bean  
668 bacteroids. Mol Plant Microbe Interact 18:67-74.
- 669 49. Chen H, Chen CY. 2014. Starvation induces phenotypic diversification and convergent  
670 evolution in *Vibrio vulnificus*. PLoS One 9:e88658.
- 671 50. Zhang X, Nicki G, Kaijalainen S, Terefework Z, Paulin L, Tighe SW, Graham PH, Lindström K.  
672 (1999) Phylogeny and Diversity of *Bradyrhizobium* Strains Isolated from the Root Nodules of  
673 Peanut (*Arachis hypogaea*) in Sichuan, China. Syst Appl Microbiol 22:378-386.
- 674 51. Schwartz W. 1972. Vincent, J.M. A Manual for the Practical Study of the Root-Nodule  
675 Bacteria (IBP Handbuch No. 15 des International Biology Program, London). XI u. 164 S., 10

676 Abb., 17 Tab., 7 Taf. Oxford-Edinburgh 1970: Blackwell Scientific Publ., 45 s. Z Allg Mikrobiol  
677 12:1521-4028.

678 52. Mania D, Heylen K, van Spanning RJ, Frostegård Å. 2016. Regulation of nitrogen metabolism  
679 in the nitrate-ammonifying soil bacterium *Bacillus vireti* and evidence for its ability to grow  
680 using N<sub>2</sub>O as electron acceptor. Environ Microbiol 18:2937-50.

681 53. Cox RD. 1980. Determination of nitrate and nitrite at the parts per billion level by  
682 chemiluminescence. Anal Chem 52:332–335.

683 54. MacArthur PH, Shiva S, Gladwin MT. 2007. Measurement of circulating nitrite and S-  
684 nitrosothiols by reductive chemiluminescence. J Chromatogr B Analyt Technol Biomed Life  
685 Sci 851:93–105.

686 55. Conthe M, Lycus P, Arntzen MØ, Ramos da Silva A, Frostegård Å, Bakken LR, Kleerebezm R,  
687 van Loosdrecht MCM. 2019. Denitrification as an N<sub>2</sub>O sink. Water Res 151:381–387.

688 56. Cox J, Mann M. 2008. MaxQuant enables high peptide identification rates, individualized  
689 p.p.b.-range mass accuracies and proteome-wide protein quantification. Nat Biotechnol  
690 26:1367-72.

691 57. Ducret A, Quardokus EM, Brun YV. 2016. MicrobeJ, a tool for high throughput bacterial cell  
692 detection and quantitative analysis. Nat Microbiol 20:16077.

693

## 694 **Figure legends**

695 **FIG 1** Bioassays for assessing the effect of starvation on electron flow to denitrification enzymes.

696 A: Bioassay 1: starvation of cells with a previously expressed denitrification proteome. Cells

697 were raised from stock cultures in fully oxic flasks containing YMB medium. When OD<sub>600</sub>



698 reached  $\sim 0.1$ , the flasks were made anoxic by He-washing, then supplemented with 1% O<sub>2</sub> in  
699 the headspace and 1 mM NO<sub>3</sub><sup>-</sup> in the liquid. The cultures were allowed to deplete the O<sub>2</sub> and to  
700 initiate denitrification when growing in YMB medium, after which they were centrifuged (10  
701 000 × g at 4 °C for 10 mins) and washed twice in sterile ddH<sub>2</sub>O. The pellets from triplicate flasks  
702 were pooled and used to inoculate flasks containing either C-free buffer or YMB medium (well-  
703 fed control), in both cases supplemented with 1 mM KNO<sub>3</sub> and 0.25 or 0.5 mM KNO<sub>2</sub>, and with  
704 He and 1 ml N<sub>2</sub>O (around 80 μmol N flask<sup>-1</sup>) in headspace. The starving cells, incubated in buffer,  
705 had a low respiratory electron flow rate (mol electrons cell<sup>-1</sup> h<sup>-1</sup>), initially being 10-18 % that of  
706 the well-fed cultures, and then decreasing to reach around 4% after 20 h. Results from  
707 experiments using Bioassay 1 are presented in Figs. 2, 3 and 4.

708 B: Bioassay 2: denitrification induced during starvation. Cells were raised from stock cultures in  
709 fully oxic flasks containing YMB medium. When OD<sub>600</sub> reached  $\sim 0.1$ , the cultures were  
710 centrifuged (10 000 × g at 4 °C for 10 mins) and washed twice in sterile ddH<sub>2</sub>O. The pellets from  
711 triplicate flasks were pooled, after which they were evenly divided and used to inoculate fully  
712 oxic flasks containing C-free buffer. These cultures were incubated for 20 h, then centrifuged  
713 after which the pellets were pooled and divided evenly before being inoculated into flasks  
714 containing C-free buffer-provided with 1 mM KNO<sub>3</sub>, and with He and 1 ml N<sub>2</sub>O (around 80 μmol  
715 N flask<sup>-1</sup>) in headspace. The respiration rate (mol electrons cell<sup>-1</sup> h<sup>-1</sup>) of the starving cultures was  
716 1-4% compared to that of well-fed cultures. All cultures in Bioassays 1 and 2 were incubated at  
717 28°C, and with vigorous stirring (650 rpm). Results from experiments using Bioassay 1 are  
718 presented in Figs. 5 and S2.

719

720 **FIG 2** Denitrification kinetics as affected by starvation in cultures with a complete denitrification  
721 proteome (Bioassay 1). Cells were allowed to develop a full denitrification proteome under well-  
722 fed conditions and were then washed twice in buffer prior to inoculation to flasks with YMB  
723 (well-fed control) or buffer (starved), supplemented with 1 mM  $\text{KNO}_3$  and 0.25 mM  $\text{KNO}_2$ , and  
724 with He plus 1 ml  $\text{N}_2\text{O}$  (around 80  $\mu\text{mol N}$ ) in headspace. A larger inoculum was given to the  
725 flasks with buffer ( $9.9\text{E}+08$  cells flask $^{-1}$ ) than to the flasks with YMB ( $5.0\text{E}+09$  cells flask $^{-1}$ ), to  
726 secure measurable activity in the starved cells and adequate time resolution of the  
727 denitrification kinetics in the well-fed cells. Panels A and B show the denitrification kinetics in  
728 well-fed and starved cultures, respectively. The flasks were practically anoxic from the start with  
729 an initial  $\text{O}_2$  concentration in the liquid of  $<0.52$   $\mu\text{M}$  which decreased to approximately 0  $\mu\text{M}$   
730 (insets in A & B). Panels C and D show the cell specific electron flow rate.  $V_{e \text{ total den}}$  designates  
731 the total electron flow to the denitrification reductases and  $V_{e \text{ total incl O}_2}$  the total electron flow,  
732 including that to denitrification and to  $\text{O}_2$ . The electron flow rate to the individual reductases is  
733 designated as  $V_{e\text{Nap}}$ ,  $V_{e\text{Nir}}$ ,  $V_{e\text{Nor}}$  and  $V_{e\text{Nos}}$ .  $V_{e\text{Nir}}$  and  $V_{e\text{Nor}}$  were practically identical and cannot be  
734 distinguished from one another in the figure. Inserted panels show  $V_{e\text{Nap}}$  throughout, including  
735 negative values which are due to slight errors in determination of  $\text{N}_2$  and  $\text{N}_2\text{O}$  ( $V_{e\text{Nap}}$  was  
736 calculated by N-mass balance). Bars in all graphs show standard deviation ( $n=3$ ).

737

738 **FIG 3** Bioassay 1 with single nitrogen oxides. Experimental conditions as for Fig. 2, but the  
739 starving cells (in buffer) were provided with either  $\text{NO}_3^-$ ,  $\text{NO}_2^-$  or  $\text{N}_2\text{O}$  in individual flasks ( $n=3$  for  
740 each treatment). Panels A-C show the gas kinetics in flasks provided with 1 mM  $\text{NO}_3^-$  (A), 0.5  
741 mM  $\text{NO}_2^-$  (B), or 70  $\mu\text{mol N}_2\text{O-N}$  added to the headspace (C). Panel D shows the cell-specific

742 electron flow rate ( $V_e$ ) measured in buffer supplemented with  $\text{NO}_3^-$ ,  $\text{NO}_2^-$  or  $\text{N}_2\text{O}$ ; the  $\text{O}_2$   
743 concentration (left y-axis); and  $V_e$  as percentage of the rates in well-fed cultures (right y-axis).  
744 The number of cells inoculated into the incubation flasks at the start (0 h of incubation in anoxic  
745 buffer) was  $3.6\text{E}+09$  for all treatments. Bars show standard deviation ( $n=3$ ).

746

747 **FIG 4** Denitrification in starved cells after addition of TMPD as an external electron donor.  
748 Preparation of the cultures followed Bioassay 1 (Fig. 1A), except that  $100\ \mu\text{M}$  TMPD and  $10\ \text{mM}$   
749 ascorbate were injected into the flasks with starving cells 15 min before the first gas sampling.  
750 Each flask was inoculated with  $5.28\text{E}+08$  cells ( $n=4$  replicate flasks). The initial  $\text{O}_2$  concentration  
751 was  $0.35\ \mu\text{M}$  and decreased to approximately 0 within 5 h (inset in A). Bars show standard  
752 deviation ( $n=4$ ). Panel A: kinetics of  $\text{NO}_2^-$ , NO,  $\text{N}_2\text{O}$  and  $\text{N}_2$  ( $\text{O}_2$  in inserted panel). Panel B:  
753 Calculated cell specific electron flow rate ( $V_e$ ,  $\text{fmol cell}^{-1}\ \text{h}^{-1}$ ) to each of the reductases Nap, Nir,  
754 Nor, and NosZ, and the total electron flow rate ( $V_{e\text{total}}$ ). The electron flow to Nir was practically  
755 identical to the electron flow to Nor (miniscule amounts of NO), and the two are shown as a  
756 single graph ( $V_{e\text{Nir/Nor}}$ ). Inset plots show  $V_{e\text{Nap}}$  throughout, including negative values which are  
757 due to slight errors in determination of  $\text{N}_2$  and  $\text{N}_2\text{O}$  ( $V_{e\text{Nap}}$  was calculated by N-mass balance).

758

759 **FIG 5** Bioassay 2: stochasticity of starvation response, response to input of organic C and  
760 quantification of denitrification enzymes. Altogether fifteen flasks were prepared following  
761 Bioassay 2 (see Fig. 1B). All flasks were anoxic ( $<0.5\ \mu\text{M}$  at the start of the incubation) and  
762 contained 50 ml buffer supplemented with  $1\ \text{mM}$   $\text{KNO}_3$  and with He plus 1 ml  $\text{N}_2\text{O}$  in the  
763 headspace. The  $\text{NO}_2^-$  concentrations, measured during the first 5 hours after incubation in the

764 buffer, were approximately  $0.59 \pm 0.20 \mu\text{M}$  (not shown). The cultures separated into two distinct  
765 phenotypes: nine flasks had “slow” respiration (panel A) and 6 flasks had “fast” respiration  
766 (panel B). The electron flow to the individual reductases ( $\text{fmol e}^- \text{cell}^{-1} \text{h}^{-1}$ ) for the flasks with  
767 slow and fast respiration are shown in panels C and D, respectively. Cultures with “slow”  
768 respiration rate had a total electron flow rate of maximum  $0.27 \text{ e}^- \text{cell}^{-1} \text{h}^{-1}$  (C) and cultures with  
769 “fast” respiration rate had a total electron flow rate of  $1.0\text{-}1.8 \text{ fmol e}^- \text{cell}^{-1} \text{h}^{-1}$  (D). The inset plot  
770 in panel C shows the electron flow to the individual denitrification reductases after the carbon  
771 addition. The cultures (entire flasks, 50 ml) were sampled for proteomics analyses at different  
772 time points (panels E and F). At timepoints throughout, marked by dashed vertical lines in  
773 panels A and B, three flasks were harvested for proteomics analysis (including 0 h). The six flasks  
774 with “fast” respiration were harvested for proteomics analysis at 5 and 20 h of incubation in  
775 these anoxic buffers (triplicates at each sampling point). Of the nine flasks with “slow”  
776 respiration, three were harvested at 10 and three at 20 h. The remaining three “slow”  
777 respiration flasks were supplemented with YMB at 24.8 h, at a concentration which made the  
778 buffer a half-strength YMB medium, containing 5 g mannitol  $\text{l}^{-1}$  and 0.25 yeast extract  $\text{l}^{-1}$ , and  
779 then harvested for proteomics at 27 h. The gas measurements and electron flows are averages  
780 from the three flasks ( $n=3$ ) for each phenotype, that were left untouched until the end of the  
781 incubation when they were sampled for proteomics. Proteomics analyses were done for  
782 triplicate flasks ( $n=3$ ) at each sampling point. Standard deviations are indicated as bars in all  
783 graphs (in several cases not visible due to low variation).

784

### Bioassay 1: Denitrification induced before starvation

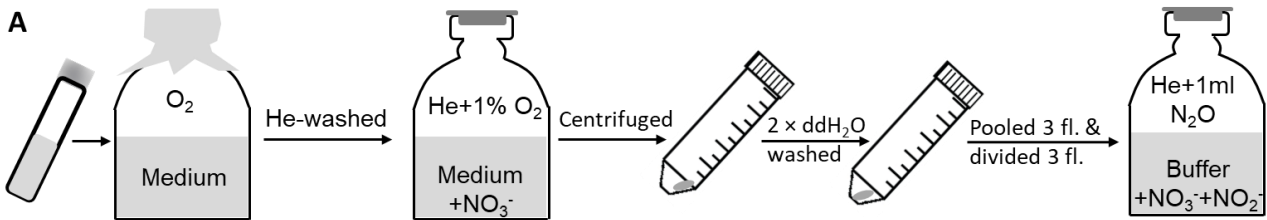

### Bioassay 2: Denitrification induced during starvation

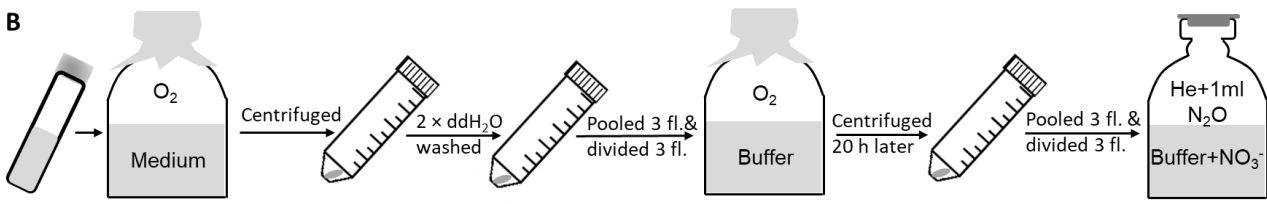

**FIG 1** Bioassays for assessing the effect of starvation on electron flow to denitrification enzymes.

**A: Bioassay 1: starvation of cells with a previously expressed denitrification proteome.** Cells were raised from stock cultures in fully oxic flasks containing YMB medium. When OD<sub>600</sub> reached ~0.1, the flasks were made anoxic by He-washing, then supplemented with 1% O<sub>2</sub> in the headspace and 1 mM NO<sub>3</sub><sup>-</sup> in the liquid. The cultures were allowed to deplete the O<sub>2</sub> and to initiate denitrification when growing in YMB medium, after which they were centrifuged (10 000 × g at 4 °C for 10 mins) and washed twice in sterile ddH<sub>2</sub>O. The pellets from triplicate flasks were pooled and used to inoculate flasks containing either C-free buffer or YMB medium (well-fed control), in both cases supplemented with 1 mM KNO<sub>3</sub> and 0.25 or 0.5 mM KNO<sub>2</sub>, and with He and 1 ml N<sub>2</sub>O (around 80 μmol N flask<sup>-1</sup>) in headspace. The starving cells, incubated in buffer, had a low respiratory electron flow rate (mol electrons cell<sup>-1</sup> h<sup>-1</sup>), initially being 10-18 % that of the well-fed cultures, and then decreasing to reach around 4% after 20 h. Results from experiments using Bioassay 1 are presented in Figs. 2, 3 and 4.

**B: Bioassay 2: denitrification induced during starvation.** Cells were raised from stock cultures in fully oxic flasks containing YMB medium. When OD<sub>600</sub> reached ~0.1, the cultures were centrifuged (10 000 × g at 4 °C for 10 mins) and washed twice in sterile ddH<sub>2</sub>O. The pellets from triplicate flasks were pooled, after which they were evenly divided and used to inoculate fully oxic flasks containing C-free buffer. These cultures were incubated for 20 h, then centrifuged after which the pellets were pooled and divided evenly before being inoculated into flasks containing C-free buffer-provided with 1 mM KNO<sub>3</sub>, and with He and 1 ml N<sub>2</sub>O (around 80 μmol N flask<sup>-1</sup>) in headspace. The respiration rate (mol electrons cell<sup>-1</sup> h<sup>-1</sup>) of the starving cultures was 1-4% compared to that of well-fed cultures. All cultures in Bioassays 1 and 2 were incubated at 28°C, and with vigorous stirring (650 rpm). Results from experiments using Bioassay 1 are presented in Figs. 5 and S2.

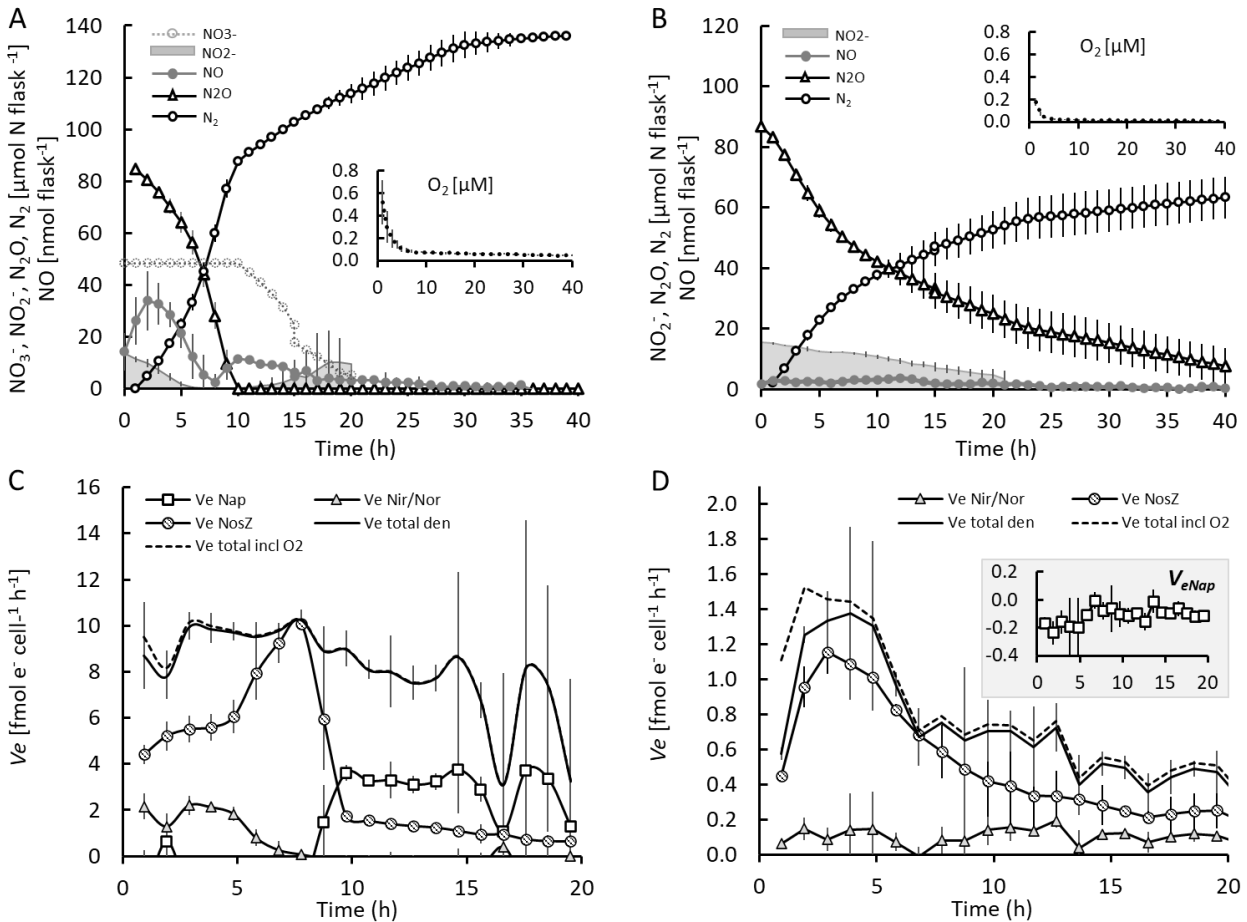

**FIG 2** Denitrification kinetics as affected by starvation in cultures with a complete denitrification proteome (Bioassay 1). Cells were allowed to develop a full denitrification proteome under well-fed conditions and were then washed twice in buffer prior to inoculation to flasks with YMB (well-fed control) or buffer (starved), supplemented with 1 mM  $\text{KNO}_3$  and 0.25 mM  $\text{KNO}_2$ , and with He plus 1 ml  $\text{N}_2\text{O}$  (around 80  $\mu\text{mol N}$ ) in headspace. A larger inoculum was given to the flasks with buffer ( $9.9\text{E}+08$  cells  $\text{flask}^{-1}$ ) than to the flasks with YMB ( $5.0\text{E}+09$  cells  $\text{flask}^{-1}$ ), to secure measurable activity in the starved cells and adequate time resolution of the denitrification kinetics in the well-fed cells. Panel A and Panel B show the denitrification kinetics in well-fed and starved cultures, respectively. The flasks were practically anoxic from the start with an initial  $\text{O}_2$  concentration in the liquid of  $<0.52 \mu\text{M}$  which decreased to approximately  $0 \mu\text{M}$  (insets in A & B). Panel C and Panel D show the cell specific electron flow rate.  $V_{e \text{ total den}}$  designates the total electron flow to the denitrification reductases and  $V_{e \text{ total incl O}_2}$  the total electron flow, including that to denitrification and to  $\text{O}_2$ . The electron flow rate to the individual reductases is designated as  $V_{e \text{ Nap}}$ ,  $V_{e \text{ Nir}}$ ,  $V_{e \text{ Nor}}$  and  $V_{e \text{ NosZ}}$ .  $V_{e \text{ Nir}}$  and  $V_{e \text{ Nor}}$  were practically identical and cannot be distinguished from one another in the figure. Inserted panels show  $V_{e \text{ Nap}}$  throughout, including negative values which are due to slight errors in determination of  $\text{N}_2$  and  $\text{N}_2\text{O}$  ( $V_{e \text{ Nap}}$  was calculated by N-mass balance). Bars in all graphs show standard deviation ( $n=3$ ).

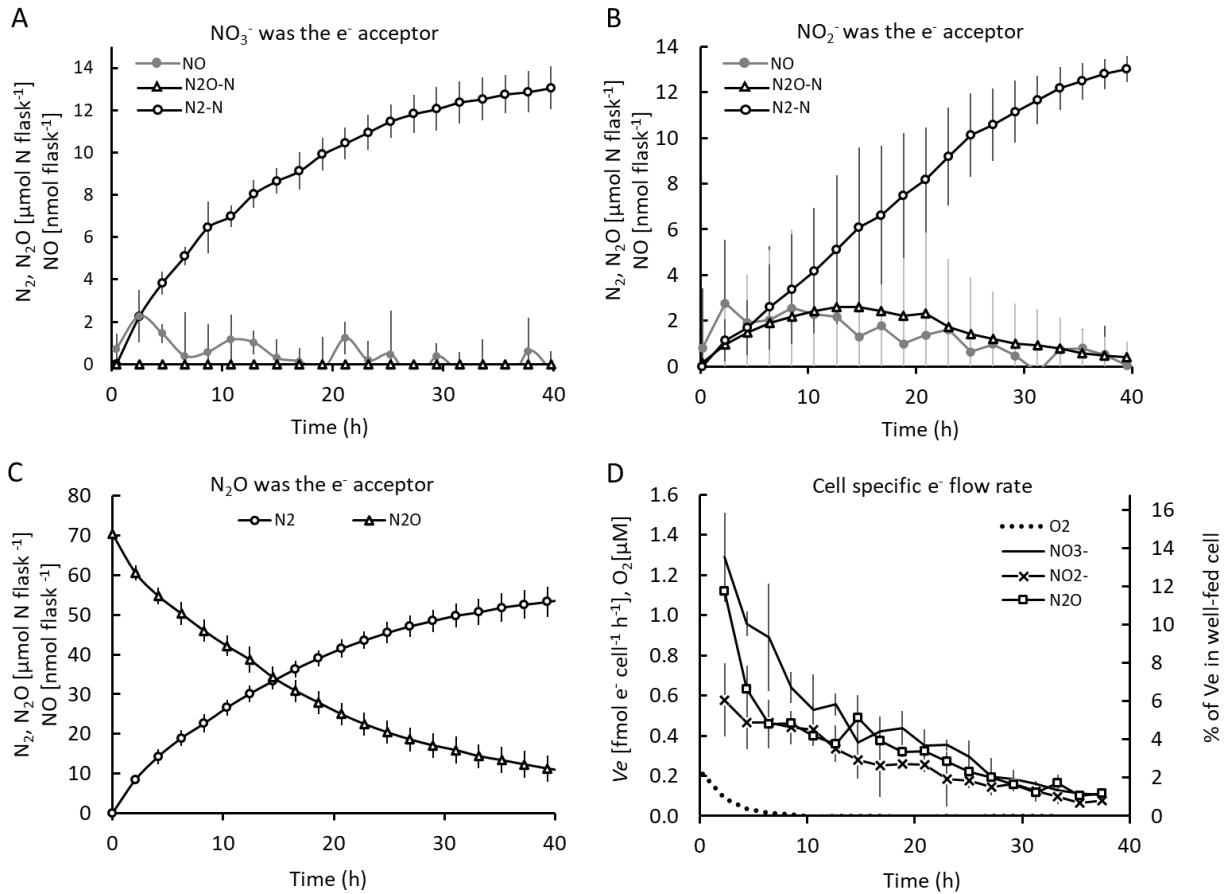

**FIG 3** Bioassay 1 with single nitrogen oxides. Experimental conditions as for Fig. 2, but the starving cells (in buffer) were provided with either  $\text{NO}_3^-$ ,  $\text{NO}_2^-$  or  $\text{N}_2\text{O}$  in individual flasks ( $n=3$  for each treatment). Panel A-C show the gas kinetics in flasks provided with 1 mM  $\text{NO}_3^-$  (A), 0.5 mM  $\text{NO}_2^-$  (B), or 70  $\mu\text{mol N}_2\text{O-N}$  added to the headspace (C). Panel D shows the cell-specific electron flow rate ( $V_e$ ) measured in buffer supplemented with  $\text{NO}_3^-$ ,  $\text{NO}_2^-$  or  $\text{N}_2\text{O}$ ; the  $\text{O}_2$  concentration (left y-axis); and  $V_e$  as percentage of the rates in well-fed cultures (right y-axis). The number of cells inoculated into the incubation flasks at the start (0 h of incubation in anoxic buffer) was  $3.6\text{E}+09$  for all treatments. Bars show standard deviation ( $n=3$ ).

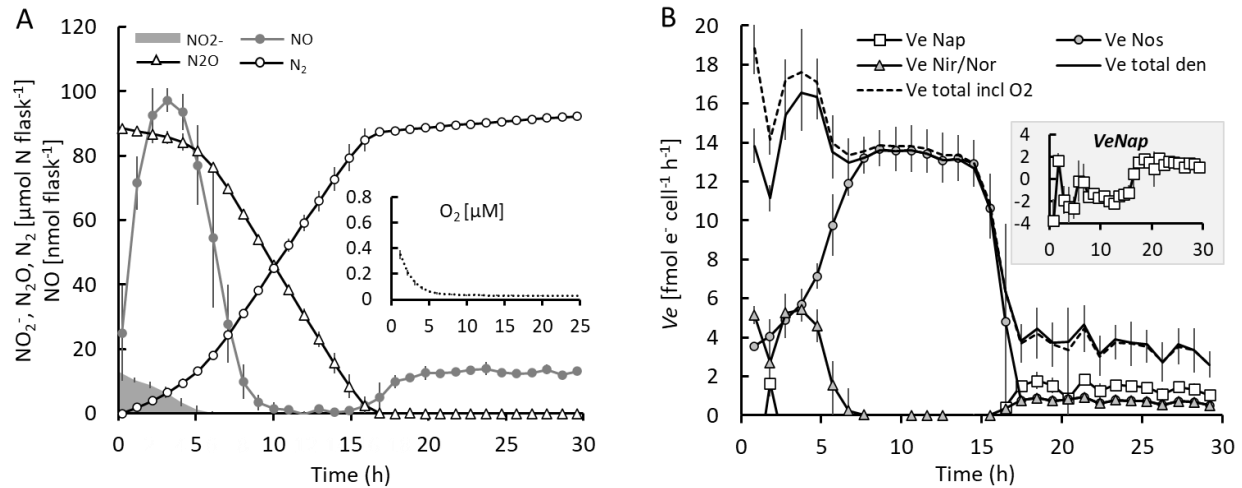

**FIG 4** Denitrification in starved cells after addition of TMPD as an external electron donor. Preparation of the cultures followed Bioassay 1 (Fig. 1A), except that 100  $\mu\text{M}$  TMPD and 10 mM ascorbate were injected into the flasks with starving cells 15 min before the first gas sampling. Each flask was inoculated with  $5.28\text{E}+08$  cells ( $n=4$  replicate flasks). The initial  $\text{O}_2$  concentration was 0.35  $\mu\text{M}$  and decreased to approximately 0 within 5 h (inset in A). Bars show standard deviation ( $n=4$ ). Panel A: kinetics of  $\text{NO}_2^-$ ,  $\text{NO}$ ,  $\text{N}_2\text{O}$  and  $\text{N}_2$  ( $\text{O}_2$  in inserted panel). Panel B: Calculated cell specific electron flow rate ( $V_e$ ,  $\text{fmol cell}^{-1} \text{h}^{-1}$ ) to each of the reductases Nap, Nir, Nor, and NosZ, and the total electron flow rate ( $V_{e\text{total}}$ ). The electron flow to Nir was practically identical to the electron flow to Nor (miniscule amounts of  $\text{NO}$ ), and the two are shown as a single graph ( $V_{e\text{Nir/Nor}}$ ). Inset plots show  $V_{e\text{Nap}}$  throughout, including negative values which are due to slight errors in determination of  $\text{N}_2$  and  $\text{N}_2\text{O}$  ( $V_{e\text{Nap}}$  was calculated by N-mass balance).



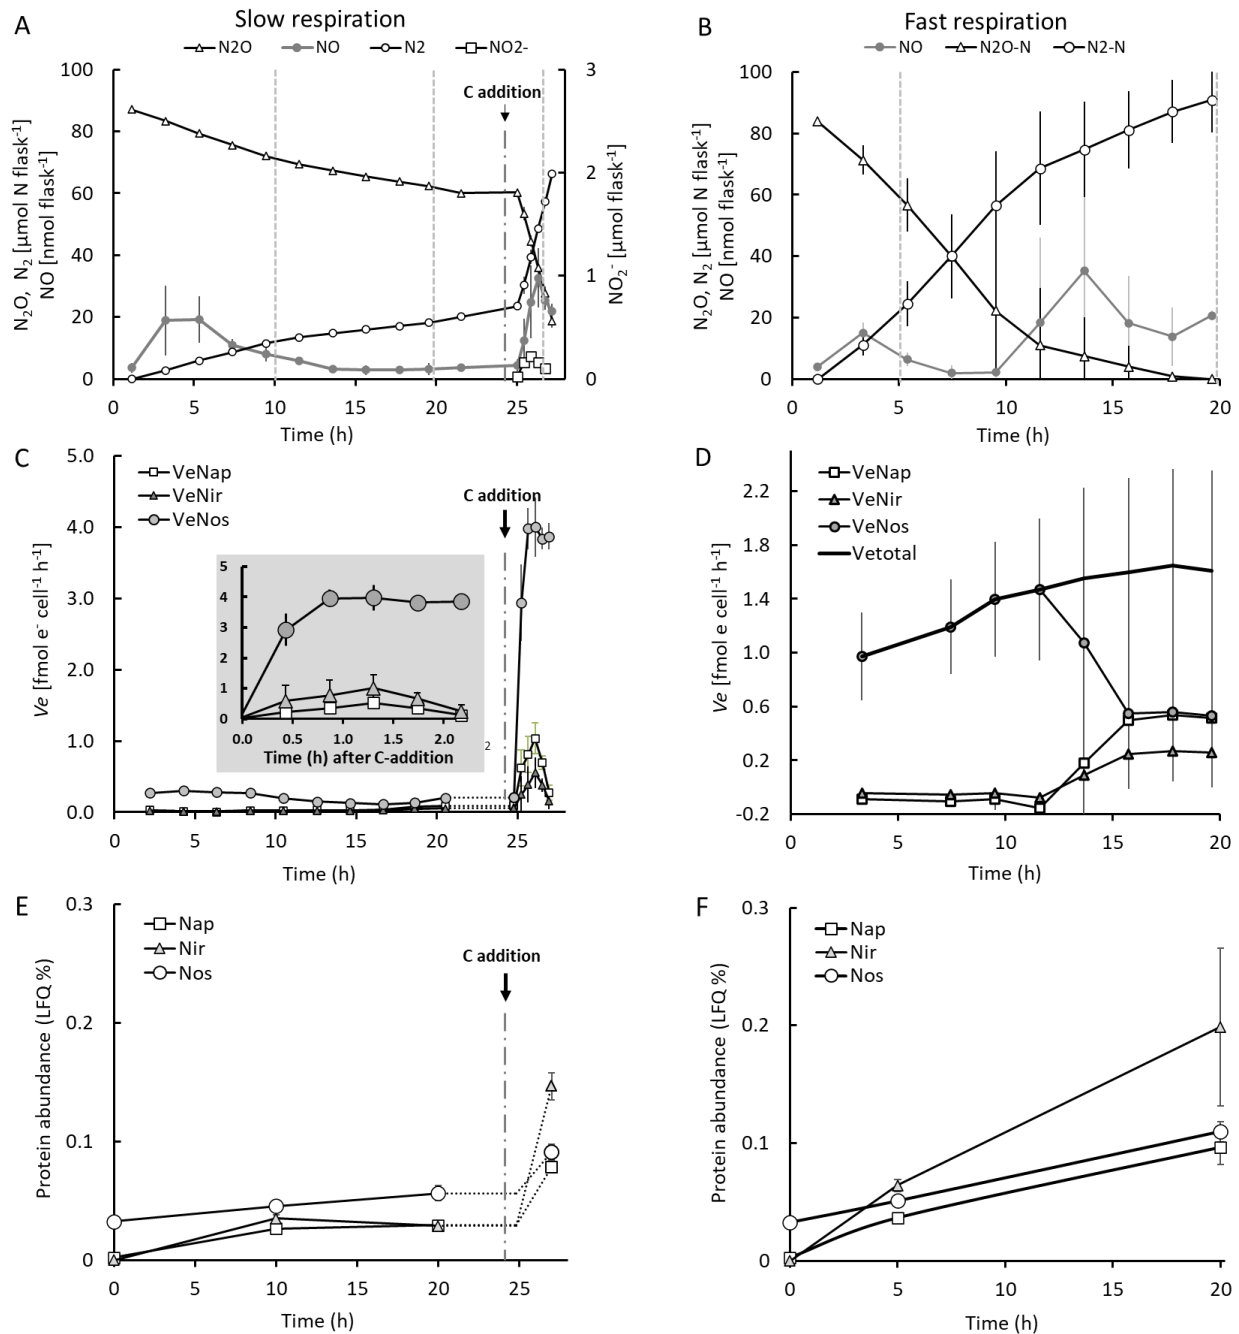

**FIG 5** Bioassay 2: stochasticity of starvation response, response to input of organic C and quantification of denitrification enzymes. Altogether fifteen flasks were prepared following Bioassay 2 (see Fig. 1B). All flasks were anoxic ( $<0.5 \mu\text{M}$  at the start of the incubation) and contained 50 ml buffer supplemented with 1 mM  $\text{KNO}_3$  and with He plus 1 ml  $\text{N}_2\text{O}$  in the headspace. The  $\text{NO}_2^-$  concentrations, measured during the first 5 hours after incubation in the buffer, were approximately  $0.59 \pm 0.20 \mu\text{M}$  (not shown). The cultures separated into two distinct phenotypes: nine flasks had “slow” respiration (panel A) and 6 flasks had “fast” respiration (panel B). The electron flow to the individual reductases ( $\text{fmol e}^- \text{cell}^{-1} \text{h}^{-1}$ ) for the flasks with slow and fast respiration are shown in panels C and D, respectively. Cultures with “slow” respiration rate had a total electron flow rate of maximum  $0.27 \text{ e}^- \text{cell}^{-1} \text{h}^{-1}$  (C) and cultures with “fast” respiration rate had

a total electron flow rate of 1.0-1.8 fmol e<sup>-</sup> cell<sup>-1</sup> h<sup>-1</sup> (D). The inset plot in panel C shows the electron flow to the individual denitrification reductases after the carbon addition. The cultures (entire flasks, 50 ml) were sampled for proteomics analyses at different time points (panels E and F). At timepoints throughout, marked by dashed vertical lines in panels A and B, three flasks were harvested for proteomics analysis (including 0 h). The six flasks with “fast” respiration were harvested for proteomics analysis at 5 and 20 h of incubation in these anoxic buffers (triplicates at each sampling point). Of the nine flasks with “slow” respiration, three were harvested at 10 and three at 20 h. The remaining three “slow” respiration flasks were supplemented with YMB at 24.8 h, at a concentration which made the buffer a half-strength YMB medium, containing 5 g mannitol l<sup>-1</sup> and 0.25 yeast extract l<sup>-1</sup>, and then harvested for proteomics at 27 h. The gas measurements and electron flows are averages from the three flasks (n=3) for each phenotype, that were left untouched until the end of the incubation when they were sampled for proteomics. Proteomics analyses were done for triplicate flasks (n=3) at each sampling point. Standard deviations are indicated as bars in all graphs (in several cases not visible due to low variation).
